# Supplementary material for: Diversity of Chemical Composition and Morphological Traits of Eight Iranian Wild Salvia Species during the First Step of Domestication
Source: MDPI journal article supplement (doi:10.3390/agronomy12102455), 2022-10-10
Supplement: s1 [file s1]

**Table S1.** Plant materials and collection details of studied *Salvia* species.

| <b>Species</b>        | <b>Location (City – Province)</b>     | <b>Latitude</b> | <b>Longitude</b> | <b>Elevation (m)</b> | <b>Collection Date</b> |
|-----------------------|---------------------------------------|-----------------|------------------|----------------------|------------------------|
| <i>S. atropatana</i>  | Lojali - North Khorasan               | 37°43'18''N     | 57°54'42''E      | 1723                 | 01-July-2015           |
| <i>S. macrosiphon</i> | Kalatenaderi - Razavi Khorasan        | 36°36'35''N     | 59°54'54''E      | 1821                 | 25-June-2015           |
| <i>S. sclarea</i>     | Reein - North Khorasan                | 37°23'11''N     | 57°23'07''E      | 1889                 | 30-June-2015           |
| <i>S. officinalis</i> | Ferdowsi University - Razavi Khorasan | 36°17'25''N     | 59°35'45''E      | 1039                 | 31-May-2015            |
| <i>S. nemorosa</i>    | Buinmeyandasht - Isfahan              | 33°01'00''N     | 50°20'16''E      | 2330                 | 16-Agust-2015          |
| <i>S. syriaca</i>     | Aligudarz - Lorestan                  | 33°10'41''N     | 49°29'35''E      | 2441                 | 15-July-2015           |
| <i>S. virgata</i>     | Afoos - Isfahan                       | 33°00'14''N     | 50°00'42''E      | 2557                 | 11-Agust-2015          |
| <i>S. virgata</i>     | Darkesh - North Khorasan              | 37°26'31''N     | 56°45'08''E      | 1239                 | 15-June-2015           |
| <i>S. virgata</i>     | Eghled - Fars                         | 30°30'45''N     | 52°43'51''E      | 2559                 | 06-July-2015           |
| <i>S. frigida</i>     | Jahrom - Fars                         | 28°29'15''N     | 53°20'48''E      | 1059                 | 26-May-2014            |
| <i>S. frigida</i>     | Targavar - Azarbayejan                | 37°12'54''N     | 44°51'33''E      | 1955                 | 11-July-2015           |

Table S2- Climatic parameters of the experimental field averaged over during the growth period.

| Month     | Min Temp<br>(°C) | Max Temp<br>(°C) | Relative<br>Humidity (%) | Precipitation<br>(mm) | Sun Radiation<br>(MJ/m2) |
|-----------|------------------|------------------|--------------------------|-----------------------|--------------------------|
| May       | 9.8              | 21.4             | 41.8                     | 0.6                   | 8.6                      |
| June      | 16.6             | 30.7             | 30.2                     | 0.1                   | 8.9                      |
| July      | 19.7             | 34.3             | 25.9                     | 0.0                   | 9.6                      |
| August    | 21.5             | 35.7             | 21.6                     | 0.1                   | 8.9                      |
| September | 18.5             | 33.9             | 31.7                     | 0.0                   | 7.3                      |
| October   | 16.3             | 31.3             | 41.9                     | 0.0                   | 6.1                      |

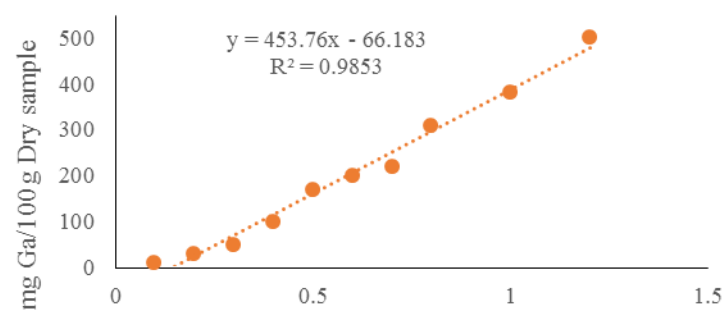

Figure S1. Calibration curve of standard gallic acid for determination of total phenolic.

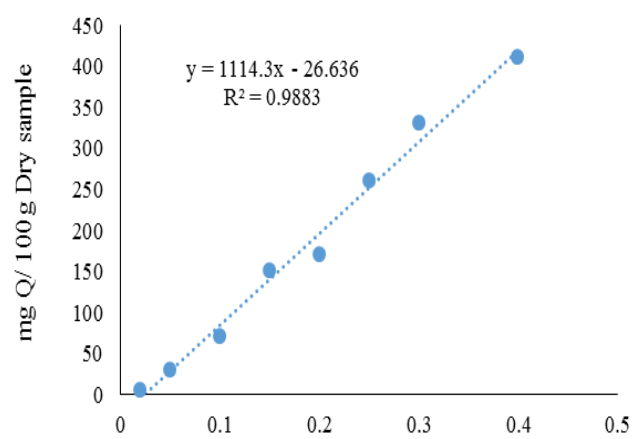

Figure S2. Calibration curve of standard quercetin for determination of flavonoid.

---

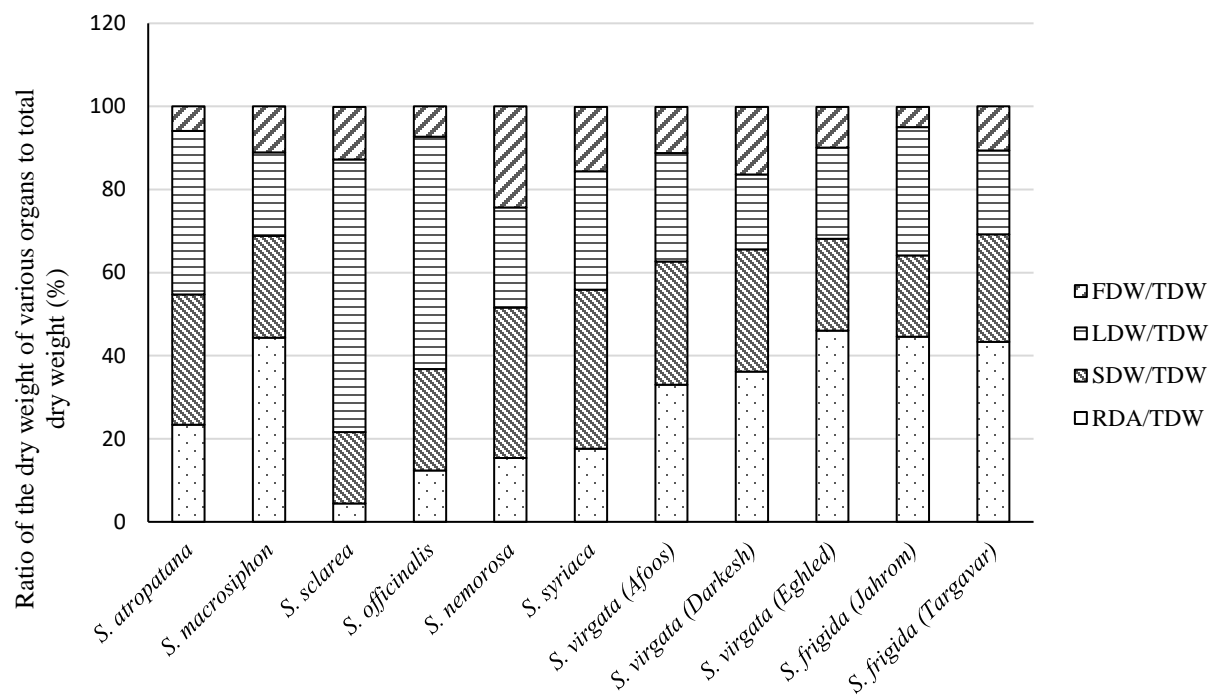

Figure S3. The ratio of the dry weight of various organs to total dry weight in *Salvia* species. TDW, Total dry weight; RDW, Root dry weight; SDW, Stem dry weight; LDW, Leaf dry weight; FDW, Flower dry weight.
